# Supplementary material for: Small Molecule Inhibitors of TEAD Auto-palmitoylation Selectively Inhibit Proliferation and Tumor Growth of NF2 -deficient Mesothelioma
Source: Oxford University Press journal article supplement (doi:10.1158/1535-7163.mct-20-0717), 2021-04-13
Supplement: 15357163mct200717-sup-249829_2_supp_6983414_qpvybp.xlsx [file 15357163mct200717-sup-249829_2_supp_6983414_qpvybp.xlsx]

## Sheet: Table S1
Table S1: Mouse IV-PO pharmacokinetic data
A. VT103
IV formulation: 2 mg/mL in 5%DMSO, 10% Solutol, 85%D5W, clear solution							PO formulation: 2 mg/mL in 5%DMSO, 10% Solutol, 85%D5W, clear solution
IV dose: 7.31 mg/kg							PO dose: 6.96 mg/kg
IV blood levels (ng/mL)							PO blood levels (ng/mL)
Time (h)	Mouse 1	Mouse 2	Mouse 3	Mean	SD	CV (%)	Time (h)	Mouse 4	Mouse 5	Mouse 6	Mean	SD	CV (%)
0.083	4340	5200	4530	4690	451.774	9.63271	0.25	370	372	421	387.667	28.8848	7.45094
0.25	3300	3580	4270	3716.67	499.233	13.4323	1	898	950	840	896	55.0273	6.14144
1	2380	2450	2690	2506.67	162.583	6.48604	2	996	784	797	859	118.823	13.8328
2	1900	1510	1630	1680	199.75	11.8899	4	846	847	855	849.333	4.93288	0.580795
4	851	889	1010	916.667	83.0321	9.05805	8	839	820	720	793	63.9296	8.06175
8	770	843	843	818.667	42.1466	5.1482	24	347	275	397	339.667	61.3297	18.0559
24	302	276	413	330.333	72.7622	22.0269
PK Parameters	Mouse 1	Mouse 2	Mouse 3	Mean	SD	CV (%)	PK Parameters	Mouse 4	Mouse 5	Mouse 6	Mean	SD	CV (%)
Rsq_adj	0.979062	0.955398	0.999991	--	--	--	Rsq_adj	0.93447	0.946155	ND	--	--	--
No. points used for T1/2	3	3	3	3	--	--	No. points used for T1/2	3	3	0	ND	--	--
C0 (ng/mL)	4973.03	6260.05	4665.05	5299.38	846.099	15.966	Cmax (ng/mL)	996	950	855	933.667	71.905	7.70136
T1/2 (h)	12.9046	11.2317	15.5139	13.2167	2.15808	16.3284	Tmax (h)	2	1	4	2.33333	1.52753	65.4654
Vdss (L/kg)	4.64906	4.26322	4.63547	4.51592	0.218948	4.84835	T1/2 (h)	14.5637	11.6133	ND	13.0885	ND	ND
Cl (mL/min/kg)	4.9253	5.12324	3.934	4.66085	0.637198	13.6713	Tlast (h)	24	24	24	24	--	--
Tlast (h)	24	24	24	24	--	--	AUC0-last (ng·h/mL)	15592.9	14351.9	14819.4	14921.4	626.723	4.20016
AUC0-last (ng.h/mL)	19113.8	19308.2	21725.6	20049.2	1455.07	7.25748	AUC0-inf (ng.h/mL)	22883.7	18959.4	ND	20921.5	ND	ND
AUC0-inf (ng.h/mL)	24736.2	23780.5	30969.3	26495.4	3903.91	14.7343	MRT0-last (h)	10.2483	9.95438	10.6158	10.2728	0.331403	3.22602
MRT0-last (h)	7.82334	7.76905	8.25996	7.95078	0.26913	3.38494	MRT0-inf (h)	21.3238	17.4394	ND	19.3816	ND	ND
MRT0-inf (h)	15.7319	13.8689	19.6385	16.4131	2.94451	17.94	AUCExtra (%)	31.8603	24.3018	ND	28.081	ND	ND
AUCExtra (%)	22.7296	18.8065	29.8479	23.7947	5.59721	23.523	AUMCExtra (%)	67.2519	56.7915	ND	62.0217	ND	ND
AUMCExtra (%)	61.5742	54.5172	70.494	62.1951	8.00648	12.8732	Bioavailability (%)a	--	--	--	78.1664	--	--
B. VT104
IV formulation: 2 mg/mL in 5%DMSO, 10% Solutol, 85%D5W, clear solution							PO formulation: 2 mg/mL in 5%DMSO, 10% Solutol, 85%D5W, clear solution
IV dose: 9.55 mg/kg							PO dose: 9.55 mg/kg
IV blood levels (ng/mL)							PO blood levels (ng/mL)
Time (h)	Mouse 1	Mouse 2	Mouse 3	Mean	SD	CV (%)	Time (h)	Mouse 4	Mouse 5	Mouse 6	Mean	SD	CV (%)
0.0833	13300	8480	9420	10400	2555.07	24.568	0.25	859	651	927	812.333	143.796	17.7016
0.25	9030	6380	7270	7560	1348.59	17.8385	1	1970	1930	1960	1953.33	20.8167	1.0657
1	5740	3220	3400	4120	1405.84	34.1225	2	2140	1740	1930	1936.67	200.083	10.3313
2	5930	2440	2650	3673.33	1957.15	53.2799	4	2630	1640	2210	2160	496.89	23.0042
4	4660	1580	1980	2740	1674.75	61.1224	8	2020	1760	1790	1856.67	142.244	7.66125
8	2000	1440	1490	1643.33	309.892	18.8576	24	1010	1070	1250	1110	124.9	11.2522
24	1520	1100	1440	1353.33	223.01	16.4786
PK Parameters	Mouse 1	Mouse 2	Mouse 3	Mean	SD	CV (%)	PK Parameters	Mouse 4	Mouse 5	Mouse 6	Mean	SD	CV (%)
Rsq_adj	0.70822	0.993027	0.428994	--	--	--	Rsq_adj	ND	0.851144	ND	--	--	--
No. points used for T1/2	6	3	5	ND	--	--	No. points used for T1/2	0	4	0	ND	--	--
C0 (ng/mL)	16139.2	9775.67	10722	12212.3	3433.59	28.1158	Cmax (ng/mL)	2630	1930	2210	2256.67	352.326	15.6127
T1/2 (h)	10.3014	39.0677	23.3693	24.2461	14.4032	59.4041	Tmax (h)	4	1	4	3	1.73205	57.735
Vdss (L/kg)	1.8464	5.30367	3.78109	3.64372	1.73272	47.5537	T1/2 (h)	ND	30.7408	ND	ND	ND	ND
Cl (mL/min/kg)	1.89322	1.65907	1.80126	1.78452	0.117972	6.61088	Tlast (h)	24	24	24	24	--	--
Tlast (h)	24	24	24	24	--	--	AUC0-last (ng·h/mL)	40553.6	35242.8	39316	38370.8	2778.7	7.2417
AUC0-last (ng.h/mL)	65443.4	38459	43978.6	49293.7	14255.8	28.9201	AUC0-inf (ng.h/mL)	ND	82696.9	ND	ND	ND	ND
AUC0-inf (ng.h/mL)	88033.4	100458	92527.8	93673.1	6291.05	6.71596	MRT0-last (h)	10.482	11.2043	11.1207	10.9357	0.395081	3.61278
MRT0-last (h)	8.45083	9.61916	9.89423	9.32141	0.766384	8.22176	MRT0-inf (h)	ND	43.996	ND	ND	ND	ND
MRT0-inf (h)	16.2545	53.2796	34.9856	34.8399	18.513	53.1373	AUCExtra (%)	ND	57.3831	ND	ND	ND	ND
AUCExtra (%)	25.6607	61.7164	52.4699	46.6156	18.7272	40.1736	AUMCExtra (%)	ND	89.1469	ND	ND	ND	ND
AUMCExtra (%)	61.3504	93.0882	86.558	80.3322	16.7599	20.8632	Bioavailability (%)a	--	--	--	77.8413	--	--

## Sheet: Table S2
Table S2: Summary of TEAD inhibitors’ anti-proliferation activity in a panel of mesothelioma cell lines.
Cell Line	VT103		VT104		VT107		NF2 Mutation	MST1 Mutation	LATS2 Mutation	Merlin Level
	GI50 (nM)	Max inh %	GI50 (nM)	Max inh %	GI50 (nM)	Max inh %
NCI-H226	1	99	16	99	9	101	very low NF2 transcript			Low/Undetectable
NCI-H2373	2	99	26	88	9	90	Homozygous deletion			Low/Undetectable
Mero-48a	5	78	98	99	34	108				Low/Undetectable
SDM103T2	2	68	60	85	22	86	Homozygous truncation	Heterozygous deleterious mut		Low/Undetectable
NCI-H2052	10	94	33	91	<12.3457	90	Homozygous truncation	Heterozygous deleterious mut		Low/Undetectable
ACC-MESO-1	5	76	20	81	26	83	Homozygous truncation			Low/Undetectable
ZL34	21	76	46	92	30	94				Low/Undetectable
JU77	232	62	70	76	41	84	Homozyous deleterious mut			Low/Undetectable
Mero-95	>10000		303	68	107	76				Low/Undetectable
ZL55	>10000		101	78	46	85				Low/Undetectable
ZL5	>10000		236	78	107	79	Heterozygous truncation	Heterozygous deleterious mut; heterozygous truncation	Heterozygous truncation	Low/Undetectable
Mero-82	>10000		243	73	77	78			Heterozygous truncation	Low/Undetectable
ONE58	>2000		135	60	38	62		Heterozygous truncation		Low/Undetectable
Mero-14	>10000		124	82	47	88		Heterozygous tolerated mut	Homozyous deleterious mut	Low/Undetectable
Mero-83	>10000		214	68	79	75				Low/Undetectable
Mero-41	>10000		984	56	135	57				Low/Undetectable
SPC111	>10000		1945	63	206	80	Heterozygous truncation	Homozygous truncation		Low/Undetectable
SPC212	>10000		>3000	56	>3000	64	Homozygous truncation	Heterozygous truncation		Low/Undetectable
NO36	>10000		>3000	41	>3000	46				Low/Undetectable
Mero-84	>10000		>3000	45	>3000	48				Low/Undetectable
ACC-MESO-4	>10000		1098	62	312	73				Detected
Mero-25	>10000		>3000	52	458	72				Detected
NCI-H28	>3000		>3000		>3000				Heterozygous tolerated mut	Detected
NCI-H2452	>3000		>3000		>3000					Detected
MSTO-211H	>3000		>3000						Heterozygous tolerated mut	Detected
HMMME			>3000	124	484	81				Detected

## Sheet: Table S3
Table S3: Reagents
A. Cell Lines
Cell Line	Source	Indication	Culture Medium
NCI-H2373	ATCC CRL-5943	sarcomatoid mesothelioma	RPMI1640+10%FBS
NCI-H2052	ATCC CRL-5915	stage 4, mesothelioma	RPMI1640+10%FBS
MSTO-211H	ATCC CRL-2081	biphasic mesothelioma	RPMI1640+10%FBS
NCI-H28	ATCC CRL-5820	Stage 4, mesothelioma	RPMI1640+10%FBS
NCI-H2452	ATCC CRL-5946	Pleural biphasic mesothelioma	RPMI1640+10%FBS
NCI-H226	ATCC CRL-5826	squamous cell carcinoma; mesothelioma	RPMI1640+10%FBS
Mero-48a	Sigma Aldrich - 09100104	malignant mesothelioma	Hams F10 + 15% FCS + 2mM Glutamine
Mero-14	Sigma Aldrich - 09100101	malignant mesothelioma	Hams F10 + 15% FCS + 2mM Glutamine
JU77	Sigma Aldrich - 10092309	malignant mesothelioma	RPMI 1640 (with 2mM L-Glutamine+ 25mM HEPES) + 5% FCS
SDM103T2	Sigma Aldrich - 11120712	malignant mesothelioma	DMEM:HAMS F12 (1:1) + 2mM Glutamine + 15% FBS
NO36	Sigma Aldrich - 10092312	malignant mesothelioma	RPMI 1640 (with 2mM L-Glutamine+25mM HEPES) + 5% FCS
ACC-MESO-1	RCB2292	malignant mesothelioma	RPMI1640+10%FBS
ZL34	Sigma Aldrich - 11120713	malignant mesothelioma	DMEM:HAMS F12 (1:1) + 2mM Glutamine + 15% FBS
Mero-95	Sigma Aldrich - 09100108	malignant mesothelioma	Hams F10 + 15% FCS + 2mM Glutamine
ZL5	Sigma Aldrich - 11120715	malignant mesothelioma	DMEM:HAMS F12 (1:1) + 2mM Glutamine + 15% FBS
ZL55	Sigma Aldrich - 12050301	epithelial tumor of the pleural cavity	DMEM:HAMS F12 (1:1) + 2mM Glutamine + 15% FBS
Mero-82	Sigma Aldrich - 09100105	malignant mesothelioma	Hams F10 + 15% FCS + 2mM Glutamine
ONE58	Sigma Aldrich - 10092313	malignant mesothelioma	RPMI 1640 (with 2mM L-Glutamine+25mM HEPES) + 5% FCS
Mero-41	Sigma Aldrich - 09100103	malignant mesothelioma	Hams F10 + 15% FCS + 2mM Glutamine
Mero-83	Sigma Aldrich - 09100106	malignant mesothelioma	Hams F10 + 15% FCS + 2mM Glutamine
SPC111	Sigma Aldrich - 11120716	malignant mesothelioma	DMEM:HAMS F12 (1:1) + 2mM Glutamine + 15% FBS
Mero-84	Sigma Aldrich - 09100107	malignant mesothelioma	Hams F10 + 15% FCS + 2mM Glutamine
SPC212	Sigma Aldrich - 11120717	malignant mesothelioma	DMEM:HAMS F12 (1:1) + 2mM Glutamine + 15% FBS
HMMME	RCB0819	malignant mesothelioma	HamF12+15%FBS
ACC-MESO-4	RCB2293	Pleural epithelioid mesothelioma	RPMI1640+10%FBS
Mero-25	Sigma Aldrich - 09100102	malignant mesothelioma	Hams F10 + 15% FCS + 2mM Glutamine
KS-1	JCRB - IFO50436	glioblastoma	EMEM with 1.5% glucose
J82	ATCC HTB-1	bladder cancer	RPMI1640+10%FBS
ACHN	ATCC CRL-1611	renal cell adenocarcinoma	RPMI1640+10%FBS
B. qPCR Primers
Primer ID	Species	Gene	Primer Sequence	Strand
CTGF-F	human	CTGF	CCAATGACAACGCCTCCTG	forward
CTGF-R	human	CTGF	TGGTGCAGCCAGAAAGCTC	reverse
CYR61-F	human	CYR61	AGCCTCGCATCCTATACAACC	forward
CYR61-R	human	CYR61	TTCTTTCACAAGGCGGCACTC	reverse
AMOTL2_F	human	AMOTL2	ACATGACCAAGTGGGA GCAGAAGT	forward
AMOTL2_R	human	AMOTL2	ACCAGTGAGCAGACCCTCATTGAA	reverse
hGAPDH-F	human	GAPDH	CCCCTTCATTGACCTCAACTACAT	forward
hGAPDH-R	human	GAPDH	CGCTCCTGGAAGATGGTGA	reverse
GUSB_F	human	GUSB	TGG TTG GAG AGC TCA TTT GGA	forward
GUSB_R	human	GUSB	GCA CTC TCG TCG GTG ACT GTT	reverse
Cyr61-F	mouse	Cyr61	GCTCAGTCAGAAGGCAGACC	forward
Cyr61-R	mouse	Cyr61	GTTCTTGGGGACACAGAGGA	reverse
Ctgf-F	mouse	Ctgf	AGTGTGCACTGCCAAAGATG	forward
Ctgf-R	mouse	Ctgf	CCAGGCAAGTGCATTGGTAT	reverse
mGAPDH-F	mouse	GAPDH	TGTGAACGGATTTGGCCGTA	forward
mGAPDH-R	mouse	GAPDH	CCCGTTGATGACAAGCTTCC	reverse
C. Antibodies
Antigen	Antibody Clone ID	Vendor	Vendor Catalog#
Pan-TEAD	D3F7L	Cell Signaling Technology	13295
TEAD1	D9X2L	Cell Signaling Technology	12292
TEAD1		Abcam	ab95029
TEAD3		Cell Signaling Technology	13224
TEAD4		Abcam	ab58310
YAP	63.7	Santa Cruz	C-101199
YAP	D8H1X	Cell Signaling Technology	14074
YAP/TAZ	D24E4	Cell Signaling Technology	8418
TAZ	V386	Cell Signaling Technology	4883
RAS		Cell Signaling Technology	3965
Vinculin	E1E9V	Cell Signaling Technology	13901
Normal IgG		Cell Signaling Technology	2729
Merlin (N-terminus)	D1D8	Cell Signaling Technology	6995
Merlin (C-terminus)	D6N8H	Cell Signaling Technology	12896
Merlin (C-terminus, Gln470 region)	D3S3W	Cell Signaling Technology	12888
beta-Actin	8H10D10	Cell Signaling Technology	3700
Hsp90	68	BD Biosciences	610418
Goat anti-Rabbit IgG (H+L), HRP		ThermoFisher Scientific	31460
Myc-Tag	9B11	Cell Signaling Technology	2276S
STREPTAVIDIN-HRP		Life	19534050
